# Supplementary material
Source: ML conference proceedings conference paper supplement (https://openreview.net/forum?id=2t5IfPAzbX)
Supplement: supplementary_material [file data.xlsx]

## Sheet: Probabilistic XAI (Final)_April
Q2	Q1	Q2	Q3	Q4	Q5	Q12	EQ1_2	EQ3_4	EQ3_5	EQ4_5	QQ1	QQ2	QQ3	QQ3_1
Consent Form By selecting agree, you acknowledge that your participation in the study is voluntary, you are at least 18 years of age, and that you are aware that you may choose to terminate your participation in the study at any time for any reason.	Please enter your Prolific ID? Please note that this response should auto-fill with the correct ID.	Age	Gender	Highest educational qualifications	The above answers are truthful to the best of my understanding.	Which of the following is a task that Blitzcrank performs in this scenario?	Which of the following two explanations should be provided to the operator? Explanation 1: Item B is highly likely to be part of a high-priority order, whereas it was initially considered to be much less likely. Explanation 2: The task can also be executed if Item B is not part of a high-priority order, provided that there is space available in the loading zone.	Which of the following two explanations should be provided to the operator? Explanation 3: Based on current information, the loading zone is much less likely to be congested. The task can also be executed if the loading zone has space available and is not congested. Explanation 4: Item A is much less likely to require additional inspection now, whereas it was originally thought to be highly likel…	Which of the following two explanations should be provided to the operator? Explanation 3: Based on current information, the loading zone is much less likely to be congested. The task can also be executed if the loading zone has space available and is not congested. Explanation 5: The assumption that the task should only be executed when Item B is part of a high-priority order is inaccurate. The …	Which of the following two explanations should be provided to the operator? Explanation 4: Item A is much less likely to require additional inspection now, whereas it was originally thought to be highly likely. The task can also be executed if Item A does not require additional inspection and the loading zone has space available. Explanation 5: The assumption that the task should only be executed…	Please briefly describe what influenced your decisions when comparing and choosing explanations?	Did you consider the operator's understanding of the task when choosing an explanation?	Did you consider any (implicit) costs associated with communicating the chosen explanations to the operator?	If answered "Yes" to the above question, please briefly explain your thinking.
{"ImportId":"QID2"}	{"ImportId":"QID1218353292_TEXT"}	{"ImportId":"QID1218353293_TEXT"}	{"ImportId":"QID1218353294"}	{"ImportId":"QID1218353295"}	{"ImportId":"QID1218353296"}	{"ImportId":"QID12"}	{"ImportId":"QID36"}	{"ImportId":"QID37"}	{"ImportId":"QID38"}	{"ImportId":"QID39"}	{"ImportId":"QID41_TEXT"}	{"ImportId":"QID42"}	{"ImportId":"QID43"}	{"ImportId":"QID44_TEXT"}
I agree	6791edc7b37beac309b94d26	40	Male	Graduate Degree	Yes	Delivering goods to the loading zone	Explanation 2	Explanation 3	Explanation 3	Explanation 4	reading comprehension	Yes	No
I agree	64762853d8c284a9e8b9368e	30	Female	High School Degree	Yes	Delivering goods to the loading zone	Explanation 2	Explanation 3	Explanation 3	Explanation 5	Because it was a high priority order which would‚Äôve required more inspection	Yes	No
I agree	64e8974d94303f0b926534ec	21	Female	Graduate Degree	Yes	Delivering goods to the loading zone	Explanation 2	Explanation 3	Explanation 5	Explanation 5	It made more sense for the AI to notify the operator wether there was enough room for low priority orders then to try and predict their priority.	Yes	No
I agree	664b3b0db7eb225f6d56922c	44	Male	Graduate Degree	Yes	Determining whether an order should be sent for manual review	Explanation 2	Explanation 3	Explanation 5	Explanation 5	The execute should take the best decision to have best execution best on the highest possibility for better result	Yes	Yes	All decision must be done by combining all the factor incurred to ensure the an effectiveness and efficiency is in place properly
I agree	665b77fe5e56c5c7609ef42d	27	Male	Undergraduate Degree	Yes	Delivering goods to the loading zone	Explanation 2	Explanation 4	Explanation 5	Explanation 5	Explanations 4 and 5 seemed more believable and coherent to the situation. Explanation 5 highlights the inaccurate interpretation of conditions.	Yes	No
I agree	611cdcbb1152bad5b9abdc92	27	Female	Undergraduate Degree	Yes	Delivering goods to the loading zone	Explanation 2	Explanation 3	Explanation 5	Explanation 5	A.I is objective and uses data to make decisions	Yes	No
I agree	675f3cb0c35a152feb00b6f7	39	Male	Undergraduate Degree	Yes	Delivering goods to the loading zone	Explanation 2	Explanation 4	Explanation 5	Explanation 5	I felt the second explanations were more detailed while concise. They were also less vague.	Yes	No
I agree	67d363e74a06495de1164e7f	34	Male	Graduate Degree	Yes	Determining whether an order should be sent for manual review	Explanation 2	Explanation 3	Explanation 3	Explanation 4	I choose the explanations according to the items with the highest probability and loading space	Yes	No
I agree	67ace733e1a50db502499926	22	Female	Undergraduate Degree	Yes	Delivering goods to the loading zone	Explanation 2	Explanation 3	Explanation 3	Explanation 4	i can say it is not about i am being influanced its all about understanding and reading	Yes	Yes	i wont say much
I agree	67d59f93704111a05e1a20f2	36	Female	Graduate Degree	Yes	Delivering goods to the loading zone	Explanation 1	Explanation 4	Explanation 3	Explanation 4	The operator is more likely to listen to evidence based explanations rather than assumptions	Yes	Yes	The cost of transporting a product to the loading zone while it was not supposed to be transported
I agree	5b00c4f74f435000018c5049	32	Male	Graduate Degree	Yes	Delivering goods to the loading zone	Explanation 1	Explanation 3	Explanation 5	Explanation 5	The choices that were the most logical were selected even if the operator's assumptions may have contradicted the choices.	Yes	No
I agree	67191c890942321a88a959dd	36	Male	Graduate Degree	Yes	Determining whether an order should be sent for manual review	Explanation 1	Explanation 4	Explanation 5	Explanation 4	My logic	Yes	No
I agree	66d8bb5477146fa2031f791c	32	Male	Graduate Degree	Yes	Delivering goods to the loading zone	Explanation 1	Explanation 4	Explanation 3	Explanation 5	Logic behind statements	Yes	No
I agree	604cab384bdb156877c9d031	27	Male	Undergraduate Degree	Yes	Delivering goods to the loading zone	Explanation 1	Explanation 3	Explanation 3	Explanation 4	I couldn't get my head around the explanations so i picked the most logical	Yes	No
I agree	664070b4d08d92e1c904a1e8	42	Male	Undergraduate Degree	Yes	Delivering goods to the loading zone	Explanation 2	Explanation 3	Explanation 5	Explanation 5	I thought that despite item b being not high priority, the loading of it should still happen because ultimately there was most likely enough space. It's about storing of decent goods above all else.	Yes	No
I agree	67d34d55aa336be15bbc95e8	55	Female	Graduate Degree	Yes	Delivering goods to the loading zone	Explanation 2	Explanation 3	Explanation 3	Explanation 4	I looked at all the information and put myself in te operator's shoes	Yes	Yes	Costs are always the first thing to think about in such situafions
I agree	5f7737e3d3a6410bfdcb06f2	24	Male	Graduate Degree	Yes	Delivering goods to the loading zone	Explanation 2	Explanation 3	Explanation 5	Explanation 5	Because it was possible to deliver the goods because it was empty	Yes	No
I agree	5e283f576dbb560114ac7714	45	Male	High School Degree	Yes	Delivering goods to the loading zone	Explanation 2	Explanation 3	Explanation 3	Explanation 5	Simple logistics was behind my decision making	Yes	No
I agree	6631ccfb6feb0e3714411b08	44	Female	Graduate Degree	Yes	Delivering goods to the loading zone	Explanation 2	Explanation 3	Explanation 3	Explanation 5	I prefer the explanations that tell me the alternative can also be executed, rather than the explanation that tells me that the operator's initial beliefs are wrong.	No	No
I agree	5fb6e42f4594d6160ce384e4	25	Male	Undergraduate Degree	Yes	Delivering goods to the loading zone	Explanation 1	Explanation 3	Explanation 3	Explanation 4	comparing them to the rules that were explained earlier, and chose what it made more sense to the rules to me	No	No
I agree	5ba85b3a46de410001ecf951	33	Male	High School Degree	Yes	Sorting items in the warehouse	Explanation 2	Explanation 3	Explanation 3	Explanation 4	I based my choices on the information provided in the hypothetical scenario	Yes	No	I did not.
I agree	5f33e30b15e48023096678e4	41	Male	Graduate Degree	Yes	Delivering goods to the loading zone	Explanation 1	Explanation 4	Explanation 3	Explanation 4	I wanted to avoid contrasting the core belief of the operator that delivery will be executed only if item B is part of high priority order.	Yes	No
I agree	5e9fd839311b8018f88c99eb	51	Female	Undergraduate Degree	Yes	Delivering goods to the loading zone	Explanation 1	Explanation 4	Explanation 3	Explanation 4	The operator's understanding.	Yes	No
I agree	6170a0c73272afad9eff9da9	56	Female	Graduate Degree	Yes	Delivering goods to the loading zone	Explanation 1	Explanation 4	Explanation 5	Explanation 5	I picked explanations that answered the real question the operator ha	Yes	Yes	Long or unnecessary explanations can waste time
I agree	5f29eff59714081a3594a331	35	Male	Graduate Degree	Yes	Delivering goods to the loading zone	Explanation 1	Explanation 4	Explanation 5	Explanation 4	The availability of space in the loading zone and item A needing further inspection are important in executing the order.	Yes	No
I agree	67d0b4c1a6cc2d65cd0dfe15	47	Male	High School Degree	Yes	Delivering goods to the loading zone	Explanation 1	Explanation 4	Explanation 5	Explanation 4	I based my decisions based on what seemed to be the most logical outcome between the options	Yes	No
I agree	6077827d5fd0204b9079a281	25	Female	Graduate Degree	Yes	Delivering goods to the loading zone	Explanation 1	Explanation 4	Explanation 3	Explanation 4	The fact that previous statements about both items were proved to be wrong or innacurate.	Yes	No
I agree	63ea87b44ffb19ba667c3abc	27	Male	Undergraduate Degree	Yes	Sorting items in the warehouse	Explanation 1	Explanation 4	Explanation 3	Explanation 4	i tried to imagine each senario and decide which one made most sense in my head.	Yes	No
I agree	6660a5fb87d2cf52cc119066	25	Female	Undergraduate Degree	Yes	Delivering goods to the loading zone	Explanation 1	Explanation 3	Explanation 3	Explanation 4	Because every delivery must be delivered whether of priority or not	Yes	No
I agree	5fc29ee9f10d240008413855	23	Male	Undergraduate Degree	Yes	Delivering goods to the loading zone	Explanation 2	Explanation 4	Explanation 3	Explanation 4	human criteria	Yes	No
I agree	6672e6b02916e61a88d5aa27	19	Female	Undergraduate Degree	Yes	Delivering goods to the loading zone	Explanation 2	Explanation 3	Explanation 3	Explanation 4	The original instructions influenced my decisions	Yes	No
I agree	66b77efae960cb419842e818	26	Female	Graduate Degree	Yes	Determining whether an order should be sent for manual review	Explanation 1	Explanation 4	Explanation 3	Explanation 5	I considered the operator's initial assumptions and concerns, choosing explanations that directly addressed and challenged those assumptions with clear and relevant justifications.	Yes	No
I agree	67d01465886e731bb1bc6b91	31	Female	Graduate Degree	Yes	Delivering goods to the loading zone	Explanation 2	Explanation 4	Explanation 5	Explanation 5	I was checking the facts item A had space why not involve B get it done in one go to save time and other service	Yes	Yes	They probably have many deliveries that they should do they cant just deliver 1 item only and they have space
I agree	673ded02fc90a023a440f809	19	Female	High School Degree	Yes	Delivering goods to the loading zone	Explanation 2	Explanation 3	Explanation 3	Explanation 4	I took in consideration the characteristics of each item	Yes	No
I agree	61282ca83be28773ac7c421f	44	Female	Undergraduate Degree	Yes	Delivering goods to the loading zone	Explanation 2	Explanation 4	Explanation 5	Explanation 5	I chose the most logical explanations that prioritized all deliveries because all customers should be important, but that would also preserve efficiency while keeping in mind that the operator may not be experienced or lacking knowledge.	Yes	No	n/a
I agree	67cca4fcdfc2f3a96280c58e	30	Male	Graduate Degree	Yes	Delivering goods to the loading zone	Explanation 2	Explanation 3	Explanation 5	Explanation 5	The first discrimination of the operator	Yes	No
I agree	672383a4299ffd0c4d4cf4ec	29	Female	Graduate Degree	Yes	Delivering goods to the loading zone	Explanation 2	Explanation 3	Explanation 5	Explanation 4	It is influenced by the 5 factors tha blitzcrank mentioned	No	Yes	The Al already evaluated all the outcome so I used the blitzcrank explanation
I agree	667a18b6a5ac2521df738cdf	40	Female	Graduate Degree	Yes	Determining whether an order should be sent for manual review	Explanation 2	Explanation 3	Explanation 5	Explanation 4	If the loads are verified and correct they can be delivered even they are less priority.	Yes	Yes	It save cost because of using available space to load less priority items.
I agree	67c03feb02005893d28221ea	26	Male	Undergraduate Degree	Yes	Delivering goods to the loading zone	Explanation 1	Explanation 3	Explanation 5	Explanation 5	Because it is all about B being part of the operators	Yes	Yes	Because I've realized that all the goods being delivered Part B is always there nor must always be there
I agree	5d88c63e488c06001baae835	40	Female	Graduate Degree	Yes	Delivering goods to the loading zone	Explanation 2	Explanation 3	Explanation 3	Explanation 4	I mainly focused on the free space of the loading zone and selected explanations that mentioned it.	Yes	No
I agree	66dff80703db0e2c9b900f52	33	Male	Graduate Degree	Yes	Delivering goods to the loading zone	Explanation 1	Explanation 3	Explanation 3	Explanation 4	It seems that the parcel os highly important and should be delivered	Yes	Yes	Because it could be damaged to to the uncertainty of being delivered and could cost them
I agree	67d13a1ec91ae2216896de44	37	Female	Graduate Degree	Yes	Delivering goods to the loading zone	Explanation 1	Explanation 3	Explanation 3	Explanation 5	i considered the operators understanding in making my decision.	Yes	Yes	i considered the cost because it is required of me to put cost into consideration while making my decision.
I agree	67c6ebd6e628fb106018d18e	26	Male	Undergraduate Degree	Yes	Delivering goods to the loading zone	Explanation 2	Explanation 3	Explanation 3	Explanation 4	I considered that there was loading space available. Therefore, I could not wait for item A when the item is there, and there is space available.	Yes	Yes	It is advisable to prioritize the completion of one task rather than awaiting high-priority assignments, particularly when there is available space. This approach can help mitigate congestion in the loading area and enhance overall efficiency.
I agree	67c5f41f66d3a659be314294	26	Male	Graduate Degree	Yes	Delivering goods to the loading zone	Explanation 2	Explanation 4	Explanation 3	Explanation 5	Checking which item is a high priority orders and also if the zone is not congested	Yes	Yes	Time is the most important thing hence if we send in the item when the zone is full it'll take long
I agree	606e3cce02e2e8a8c965ca75	33	Female	Graduate Degree	Yes	Delivering goods to the loading zone	Explanation 1	Explanation 4	Explanation 3	Explanation 4	if the item was a high priority at first it means that there s no need to inspect it because high priority items are inspected first.	Yes	No
I agree	6710c4cf3a160f87690ff9e8	19	Female	High School Degree	Yes	Delivering goods to the loading zone	Explanation 1	Explanation 3	Explanation 3	Explanation 5	Item A likely requires additional inspection and the loading zone might have space available.	Yes	No
I agree	6776b334346a07f6d4ae01be	22	Male	Undergraduate Degree	Yes	Delivering goods to the loading zone	Explanation 2	Explanation 3	Explanation 3	Explanation 4	I prioritized that provided new information and challenged the operator assumption.	Yes	Yes	I focused on explanations that shows their stated beliefs and decisions
I agree	60f49c9e35d92586a13216fd	26	Male	Graduate Degree	Yes	Delivering goods to the loading zone	Explanation 2	Explanation 3	Explanation 5	Explanation 4	The way that the explanations were explained	Yes	No
I agree	6507b9bb591942406e5f8217	22	Male	Undergraduate Degree	Yes	Delivering goods to the loading zone	Explanation 1	Explanation 3	Explanation 5	Explanation 5	The AI will consider the most efficient way to do things - so the reasoning given is in line with this.	Yes	No
I agree	65aaccdd0f64752d5fccad7e	33	Other	Graduate Degree	Yes	Determining whether an order should be sent for manual review	Explanation 2	Explanation 4	Explanation 3	Explanation 4	The best and simple solutions	Yes	No
I agree	667ed23eec522f322665ab7b	19	Male	Other	Yes	Delivering goods to the loading zone	Explanation 2	Explanation 3	Explanation 5	Explanation 5	the extra space being possible room for the item	No	No
I agree	60b7d851f18e424aa48f30a0	32	Female	Undergraduate Degree	Yes	Delivering goods to the loading zone	Explanation 1	Explanation 4	Explanation 5	Explanation 4	The idea that there loading zone only works with items that have been surveyed and are off high quality	Yes	No
I agree	6565f30534fa8e3635cdd078	54	Male	Undergraduate Degree	Yes	Delivering goods to the loading zone	Explanation 1	Explanation 4	Explanation 5	Explanation 4	The explanations that made the operator reconsider her information to be wrong seems most likely to be effective.	Yes	No
I agree	66a2a8ad3f2631ab5c2c4995	41	Female	High School Degree	Yes	Determining whether an order should be sent for manual review	Explanation 2	Explanation 3	Explanation 3	Explanation 4	The loading area and item a description	Yes	No
I agree	60f814d5348f2f80c0e60c3a	22	Male	Undergraduate Degree	Yes	Delivering goods to the loading zone	Explanation 2	Explanation 3	Explanation 5	Explanation 5	my decisions were influence by space	No	No
I agree	6734aad17ce06a6ae8ceb197	28	Female	Undergraduate Degree	Yes	Delivering goods to the loading zone	Explanation 2	Explanation 3	Explanation 5	Explanation 5	That they were talking about the space and the priority, that is for me the part that I was focusing more	Yes	No
I agree	5e248b6f0c0b31718a9d3f31	23	Male	Undergraduate Degree	Yes	Delivering goods to the loading zone	Explanation 2	Explanation 3	Explanation 3	Explanation 4	I choose the explanation that appeard to make the most sense and was least confusing.	Yes	No
I agree	647e5f4c5b7dfbc365335f72	55	Female	Undergraduate Degree	Yes	Sorting items in the warehouse	Explanation 1	Explanation 3	Explanation 3	Explanation 5	Logic	Yes	No
I agree	65f0ae4f838dcca4426e1a44	24	Female	Graduate Degree	Yes	Delivering goods to the loading zone	Explanation 2	Explanation 3	Explanation 3	Explanation 4	I chose the explanations that had a friendlier undertone as opposed to the ones that seemed authoritative. As well as putting into regard that the explanations explained properly the agent's points.	Yes	No
I agree	5a0c036857cee70001767a58	54	Female	Graduate Degree	Yes	Delivering goods to the loading zone	Explanation 2	Explanation 3	Explanation 5	Explanation 5	most plausible and easily understood explanation	Yes	No
I agree	66be0003238f1f344b4c76ba	23	Female	Graduate Degree	Yes	Delivering goods to the loading zone	Explanation 1	Explanation 3	Explanation 3	Explanation 4	By understanding what they do to one s choice	Yes	No
I agree	615b5902e51bcad574d81203	30	Female	Graduate Degree	Yes	Delivering goods to the loading zone	Explanation 1	Explanation 3	Explanation 3	Explanation 4	I'm trying to be in the shoes of the human being and also consider the fact that delivery can only be done if item is of high priority	Yes	No
I agree	66952022eeb1290c2d6564f7	25	Female	Graduate Degree	Yes	Sorting items in the warehouse	Explanation 2	Explanation 3	Explanation 3	Explanation 5	The decisions I made were based on the operator‚Äôs understanding of the task.	Yes	Yes	The implicit costs associated with communicating the chosen explanations to the operator will come at a greater cost but it will benefit both the operator and the company
I agree	60be9461f162e71cab759c78	34	Male	High School Degree	Yes	Delivering goods to the loading zone	Explanation 1	Explanation 3	Explanation 5	Explanation 5	My decisions were influenced by how well each explanation addressed the operator‚Äôs key misunderstandings. I prioritized explanations that directly challenged incorrect beliefs (ex: about Item B‚Äôs priority and Item A‚Äôs inspection) and those that corrected the operator‚Äôs decision rule, making it easier for them to understand Blitzcrank‚Äôs reasoning.	Yes	No
I agree	669bb9d70a87ffe3eece7c08	28	Female	High School Degree	Yes	Determining whether an order should be sent for manual review	Explanation 1	Explanation 4	Explanation 3	Explanation 4	I was guided by the fact that the operator believed that Blitzcrank should execute the delivery task only if Item B is part of a high-priority order. I chose explanations that could convince the operator to execute the delivery task without conflicting their opinion	Yes	No
I agree	64675f06fbd5b6705cbe9ba9	28	Female	Other	Yes	Delivering goods to the loading zone	Explanation 2	Explanation 3	Explanation 3	Explanation 4	I chose what Id prefer to hear if I was in that scenario and how each statement would make me feel once i heard them said back to me	Yes	No
I agree	6508a16dd286beb047e70918	36	Male	Other	Yes	Delivering goods to the loading zone	Explanation 2	Explanation 3	Explanation 3	Explanation 5	Of there's space in the zone and the area is not congested even if item B it's much less considered to be delivered, the delivery of item B can be made of the conditions are the right.	Yes	Yes	An item delivered leaves space for a new item to be delivered, that translates to a better income. Of course, again, If the conditions are right for the task to be carried out with minimal risk.
I agree	5b84a7ea4f38790001778d53	31	Male	Graduate Degree	Yes	Delivering goods to the loading zone	Explanation 2	Explanation 3	Explanation 3	Explanation 4	Explanations that were more in accordance with the human operators beliefs were better	Yes	No
I agree	67d00d1c9524a1e1d28a2850	18	Female	High School Degree	Yes	Delivering goods to the loading zone	Explanation 2	Explanation 4	Explanation 3	Explanation 5	My answers are based on the case study	Yes	No
I agree	672b09016873ae65e93e6072	41	Female	Graduate Degree	Yes	Delivering goods to the loading zone	Explanation 2	Explanation 3	Explanation 3	Explanation 4	I just chose the options that were more likely to be true.	Yes	No
I agree	67740c7aaf9a0a0f74047e8b	19	Male	Graduate Degree	Yes	Delivering goods to the loading zone	Explanation 1	Explanation 4	Explanation 5	Explanation 4	Experience and personal judgment	Yes	No
I agree	66cf43db332889da5054c9e8	27	Female	Undergraduate Degree	Yes	Delivering goods to the loading zone	Explanation 2	Explanation 3	Explanation 3	Explanation 5	It‚Äôs the availability of space in the loading zone even though item B was not initially considered priority.	Yes	No
I agree	670660e3dd9e4d26b56543fa	65	Female	Graduate Degree	Yes	Delivering goods to the loading zone	Explanation 1	Explanation 3	Explanation 5	Explanation 5	The operator should only execute the delivery task if it is confirmed that Item B is part of a high-priority order.	Yes	No
I agree	66b9af8ca020d514f5131634	26	Female	Graduate Degree	Yes	Determining whether an order should be sent for manual review	Explanation 2	Explanation 4	Explanation 5	Explanation 5	I choose the decisions according to my understanding of the scenario they gave me.	Yes	No
I agree	664d01a8e8a3420b747c6c26	25	Male	Graduate Degree	Yes	Delivering goods to the loading zone	Explanation 2	Explanation 3	Explanation 5	Explanation 5	I chose the explanation that was easy to understand and had the most accurate information.	Yes	No
I agree	6129dca465e41b5ae1b262da	24	Female	Undergraduate Degree	Yes	Delivering goods to the loading zone	Explanation 2	Explanation 4	Explanation 3	Explanation 4	I chose the most believable answer.	Yes	No
I agree	65f58b399426c824ebce27ce	31	Male	Graduate Degree	Yes	Delivering goods to the loading zone	Explanation 1	Explanation 4	Explanation 5	Explanation 4	My decisions were influenced by the relevance of each explanation to the operator‚Äôs initial beliefs and assumptions. I prioritized explanations that directly addressed the operator‚Äôs key concern‚Äîthat delivery should only happen if Item B is a high-priority order. Explanations that clearly justified Blitzcrank‚Äôs decision, either by confirming or correcting the operator‚Äôs assumptions, wer…	Yes	Yes	My decisions were influenced by the relevance of each explanation to the operator‚Äôs initial beliefs and assumptions. I prioritized explanations that directly addressed the operator‚Äôs key concern‚Äîthat delivery should only happen if Item B is a high-priority order. Explanations that clearly justified Blitzcrank‚Äôs decision, either by confirming or correcting the operator‚Äôs assumptions, wer…
I agree	67c808a7336acde4dc2b9d73	69	Male	Graduate Degree	Yes	Determining whether an order should be sent for manual review	Explanation 1	Explanation 4	Explanation 3	Explanation 4	Going back to the first scenario to try and understand better	Yes	No
I agree	610c6c0904a537eaadf52096	27	Female	Other	Yes	Delivering goods to the loading zone	Explanation 2	Explanation 3	Explanation 3	Explanation 5	the information avaiolable on the explanation	No	No
I agree	67c6f437ecaeee79e33ea3a9	19	Male	High School Degree	Yes	Delivering goods to the loading zone	Explanation 2	Explanation 4	Explanation 5	Explanation 5	What influenced my decisipns was making sure I chose the response that would assist the operator best.	Yes	Yes	There may be extra cost to have the ai agent perform more complex answers etc.
I agree	675d7a2b151a03925196ff02	33	Female	Other	Yes	Delivering goods to the loading zone	Explanation 1	Explanation 3	Explanation 3	Explanation 4	Positive explanations, explanations that were less likely. Explanations that made it easy to evaluate those different explanations.	Yes	Yes	The operator has her own belief and understanding.
I agree	67d24e19b9ef710a7c1ef3ec	32	Female	Graduate Degree	Yes	Delivering goods to the loading zone	Explanation 2	Explanation 4	Explanation 5	Explanation 4	From the scenario that we were given, I noticed that explanation 2 was highly possible in everyway which means it is something that can happen 50-100%sure so they are going to be able to deliver unlike explanation 1.	Yes	Yes	With explanation2 the I'm 100% sure that the operator was going to be satisfied because B has a high priority order it does not require additionalinspection
I agree	67922ecc7323cc3eac92023a	19	Female	Graduate Degree	Yes	Delivering goods to the loading zone	Explanation 1	Explanation 3	Explanation 3	Explanation 4	l only execute delivery task if item B is part of a high-priority order	Yes	No	i
I agree	67c5e50726fc9e67cdaff02f	47	Male	Graduate Degree	Yes	Delivering goods to the loading zone	Explanation 1	Explanation 3	Explanation 3	Explanation 4	For safe delivery to take place, loading zone must have space and free from hazards that can cause accidents.	Yes	Yes	additional inspection was required
I agree	67ac4bd4c0b43b988f6f46eb	24	Female	Undergraduate Degree	Yes	Delivering goods to the loading zone	Explanation 1	Explanation 4	Explanation 5	Explanation 5	Each explanation was addressedand corrected the operators incorrect assumptions.	Yes	Yes	I considered the need to balance the helpfuness of the explanation with the time and effort it would take the operator to understand it.
I agree	67ab0bb24c0fc6ce2f1bd6c3	49	Female	Graduate Degree	Yes	Delivering goods to the loading zone	Explanation 2	Explanation 3	Explanation 3	Explanation 4	The operator's perspectives influenced my decision	Yes	No
I agree	6616a393d37ef167d8bc37ce	20	Female	High School Degree	Yes	Determining whether an order should be sent for manual review	Explanation 1	Explanation 3	Explanation 3	Explanation 5	I prioritized explanations that directly addressed the operator's understanding of the situation. For example, the operator believed that Item B needed to be part of a high-priority order, so explanations that either confirmed or corrected this belief were crucial.	Yes	No
I agree	6731b77af6e8e00a06ffa7ee	38	Male	Graduate Degree	Yes	Delivering goods to the loading zone	Explanation 2	Explanation 4	Explanation 5	Explanation 4	Facts. I chose explanations that has a much more support towards logical explanation with factual evidence to support it e.g rather than say "the assumption that..... is inaccurate", the th system should rather place emphasis on facts such that there is much more evidential support towards proper decision making, e.g "there is space in the warehouse.." etc.	Yes	No
I agree	67d567449b933420ec025aa6	35	Male	Graduate Degree	Yes	Delivering goods to the loading zone	Explanation 1	Explanation 4	Explanation 3	Explanation 4	whether the loading zone was congested or not	Yes	No
I agree	67c624ba952dd8396a89dec8	24	Female	Graduate Degree	Yes	Delivering goods to the loading zone	Explanation 1	Explanation 3	Explanation 3	Explanation 4	My decisions were influenced by possibility that those explanations were viable and addressed the concerns of the operater clearly.	No	No	Not applicable
I agree	677cea851b45fb93eab1cf15	24	Female	Undergraduate Degree	Yes	Delivering goods to the loading zone	Explanation 1	Explanation 4	Explanation 5	Explanation 5	en comparing and choosing explanations, I focused on the key assumptions and beliefs held by the operator: 1. Understanding the operator‚Äôs core beliefs: The operator believed that the task should only be executed if Item B is part of a high-priority order. Thus, explanations that directly addressed or corrected this misunderstanding were prioritized. 2. Relevance to the core issue: Explanation …	Yes	Yes	Yes, I did consider the operator‚Äôs understanding of the task when choosing an explanation. 1. Operator‚Äôs Understanding: I considered the operator‚Äôs belief that the task should only be executed if Item B is part of a high-priority order. Therefore, I prioritized explanations that directly addressed this misunderstanding (Explanation 5). I also took into account that the operator believes the…
I agree	67aa527deac4b628c7f51771	23	Female	Graduate Degree	Yes	Delivering goods to the loading zone	Explanation 1	Explanation 4	Explanation 3	Explanation 5	I chose explanations that addressed the operater's concerns, making it clearer to him why those options were chosen.	Yes	No	I choose explanations that were clear and helped the operater understood the concerns.
I agree	67c864a2517623377115fe22	25	Male	Undergraduate Degree	Yes	Delivering goods to the loading zone	Explanation 1	Explanation 3	Explanation 3	Explanation 4	I considered that delivery should only be done if B is part of a high priority order and the availab of space in the loading zone.	Yes	No
I agree	672e7ede51cf3b8f8deb9545	21	Female	Undergraduate Degree	Yes	Delivering goods to the loading zone	Explanation 2	Explanation 4	Explanation 5	Explanation 5	I Choose direct explanation that will help the operator to understand or be able to clarify the concerns.	Yes	Yes	Yes, I implicitly considered the costs. I chose an explanation that was clear and able to address operator's concerns reducing the need of additional clarification and simple to understand.
I agree	67caae6f152a736ade05dacf	55	Male	Graduate Degree	Yes	Delivering goods to the loading zone	Explanation 1	Explanation 3	Explanation 3	Explanation 4	My decisions were influenced by how well the explanations addressed the operator's concerns and make sense to him.	Yes	Yes	I considered the operator's knowledge of the task when choosing the explanations and costs which can be incurred if we made wrong decisions.
I agree	67c6e69dc44b7d93916f6cb7	26	Male	Graduate Degree	Yes	Delivering goods to the loading zone	Explanation 2	Explanation 4	Explanation 3	Explanation 4	the availability f space at the loading zone	No	No
I agree	6791f6dd715489698cb9523e	28	Male	Graduate Degree	Yes	Delivering goods to the loading zone	Explanation 2	Explanation 4	Explanation 3	Explanation 4	I considered whether there was space available at the loading site	Yes	No
I agree	67d176d43a49e93492696734	25	Male	Graduate Degree	Yes	Delivering goods to the loading zone	Explanation 1	Explanation 4	Explanation 5	Explanation 5	information changed with time	Yes	No
I agree	67cf58ee6ae53da5f77f5eb0	27	Female	Undergraduate Degree	Yes	Delivering goods to the loading zone	Explanation 2	Explanation 4	Explanation 5	Explanation 4	Explanation 2 explains the whole decision accurately, but when having to choose between the other explanations, what influenced me to choose those explanations is that Item B is actually not a priority order, and that Item A still needed some inspection.. so what's balanced there is having atleast enough space to hold the two items, and an inspection on Item A is more important than being that co…	Yes	Yes	The only cost would be time, because if a delivery takes time to be inspected it means the receiver could be offered free shipping
I agree	67343989a03952ea40085917	27	Male	Graduate Degree	Yes	Delivering goods to the loading zone	Explanation 2	Explanation 4	Explanation 5	Explanation 5	The fact that there is additional space available and priorities would not be compromised, in addition, needs and demands might change at any point in time irrespective of whatever was the priority initially	Yes	Yes	The major cost would be when the goods are required, they are not available to be used because priorities could change at a moment's notice
I agree	661bfaacdb7c66838bc16244	32	Male	Other	Yes	Delivering goods to the loading zone	Explanation 1	Explanation 4	Explanation 5	Explanation 4	Honestly, they all sounded suspicious and I wouldn't have trusted any of them. I picked the ones that seemed reasonable enough.	No	No
I agree	65c77707ba3a0380de2a7c24	29	Male	Undergraduate Degree	Yes	Delivering goods to the loading zone	Explanation 1	Explanation 4	Explanation 5	Explanation 4	Whether they contained new information	Yes	No
I agree	5d45521afdaaad00010ec185	63	Female	Undergraduate Degree	Yes	Delivering goods to the loading zone	Explanation 2	Explanation 4	Explanation 5	Explanation 5	I chose those that would appear most logical to the operator.	Yes	No
I agree	65b5456d6679c01a417023f2	18	Female	High School Degree	Yes	Delivering goods to the loading zone	Explanation 2	Explanation 3	Explanation 3	Explanation 4	It was the AI requirements and the operators understanding	Yes	No
I agree	5c7d9260b5254b0001906c92	67	Male	High School Degree	Yes	Delivering goods to the loading zone	Explanation 2	Explanation 4	Explanation 5	Explanation 4	practical and logical thinking	Yes	No
I agree	6614daf007670261189c3e8a	37	Female	High School Degree	Yes	Delivering goods to the loading zone	Explanation 1	Explanation 4	Explanation 5	Explanation 5	Based on a fact that I asked to rate the explanations from the operator's perspective I found the chosen ones more usefull.	No	No
I agree	664f3e9464fc43338349d6b3	33	Female	High School Degree	Yes	Determining whether an order should be sent for manual review	Explanation 2	Explanation 3	Explanation 3	Explanation 4	rational thinking	Yes	No
I agree	6162f69802a7e6ff99084a66	25	Female	Undergraduate Degree	Yes	Delivering goods to the loading zone	Explanation 1	Explanation 4	Explanation 5	Explanation 4	I thought of what made sense and how the operator would have thought	Yes	No
I agree	60d78cd9ff61ba5de66359ea	28	Male	High School Degree	Yes	Sorting items in the warehouse	Explanation 1	Explanation 4	Explanation 3	Explanation 4	My logic is based around on how important is the item that is to be delivered, rather than making it a matter of space availability	No	No
I agree	65e9fbe46ad3a93ae116ca4b	37	Male	Undergraduate Degree	Yes	Determining whether an order should be sent for manual review	Explanation 2	Explanation 4	Explanation 5	Explanation 5	I chose explanations that addressed the operator's concerns, cleared up misunderstandings, and provided accurate and clear information.	Yes	No
I agree	5f2ccbf8afada41f01235425	20	Male	High School Degree	Yes	Delivering goods to the loading zone	Explanation 1	Explanation 3	Explanation 3	Explanation 4	I tried to avoid any confrontation or contrasting opinions between the operator and blitzcrank	Yes	Yes	I thought that there could be a problem if I chose an option that contradicted what the operator believed
I agree	66cda94f3c1bd8f7cc321ba8	38	Male	Graduate Degree	Yes	Delivering goods to the loading zone	Explanation 1	Explanation 3	Explanation 3	Explanation 5	I tried to understand both version well, it wasn't very easy I must admit	Yes	No
I agree	67b85a92cd6f42ed5661380c	38	Female	Graduate Degree	Yes	Delivering goods to the loading zone	Explanation 1	Explanation 3	Explanation 3	Explanation 5	task B is also important even though it doesnt hold the same value	Yes	No
I agree	654bb67731d80b392070f9ee	62	Female	High School Degree	Yes	Delivering goods to the loading zone	Explanation 1	Explanation 3	Explanation 3	Explanation 4	Wybiera≈Çam opisy kt√≥re wed≈Çug mnie by≈Çy by bardziej zrozumia≈Çe dla operatora , kt√≥re nie by≈Çy bardzo skomplikowane a logiczne i proste do zrozumienia.	Yes	No
I agree	674d86d9e794b20fbd3889b3	28	Female	Undergraduate Degree	Yes	Delivering goods to the loading zone	Explanation 1	Explanation 4	Explanation 5	Explanation 4
I agree	66c22ef34aade7059ca16325	47	Male	Graduate Degree	Yes	Delivering goods to the loading zone	Explanation 1	Explanation 3	Explanation 3	Explanation 4
I agree	663b638be7226d4e3fcc255f	27	Female	Undergraduate Degree	Yes	Delivering goods to the loading zone	Explanation 1	Explanation 4	Explanation 3	Explanation 4
I agree	606b7218236ee00cd8a0b17d	25	Male	Undergraduate Degree	Yes	Delivering goods to the loading zone	Explanation 1	Explanation 3	Explanation 5	Explanation 4
I agree	67c9c0e4759cc61a82b6e38f	40	Female	Graduate Degree	Yes	Sorting items in the warehouse	Explanation 1	Explanation 4	Explanation 5	Explanation 4	The key information given at the beginning of the survey	Yes	No
I agree	66967bf94e306aa9a0490c42	41	Male	Undergraduate Degree	Yes	Sorting items in the warehouse	Explanation 2	Explanation 3	Explanation 3	Explanation 5	Likelihood based on assumptions of low-priority scenarios.	Yes	No
I agree	668d458320f2decaefd87cd2	29	Male	Graduate Degree	Yes	Delivering goods to the loading zone	Explanation 1	Explanation 3	Explanation 5	Explanation 4	I used the understanding of the operator and the instructions given	Yes	No
I agree	5cf8012a542f5400196a1493	61	Female	High School Degree	Yes	Delivering goods to the loading zone	Explanation 2	Explanation 4	Explanation 5	Explanation 5	My decisions were based on the analysis of the situation presented and I chose those that in my opinion best explained the situation and the likelihood of them happening.	Yes	No
I agree	654408a582c9a22f5550e60e	62	Female	High School Degree	Yes	Delivering goods to the loading zone	Explanation 2	Explanation 3	Explanation 5	Explanation 5	I tried to choose the simplest explanation.	Yes	No
I agree	5f29a441eecf340f7e5090a9	24	Female	Undergraduate Degree	Yes	Delivering goods to the loading zone	Explanation 2	Explanation 3	Explanation 5	Explanation 5	I chose explanations which did not change probabilities	Yes	No
I agree	67acf0085dfc5ce9a5adc164	36	Male	Graduate Degree	Yes	Delivering goods to the loading zone	Explanation 2	Explanation 4	Explanation 5	Explanation 4	understability and differences between the thoughts	Yes	No
I agree	66ff353752eb0274c34253fe	23	Male	Graduate Degree	Yes	Delivering goods to the loading zone	Explanation 1	Explanation 3	Explanation 5	Explanation 5	I simply considered the higher implicit probability of bias on the part of the human operator, given that despite years of experience, that experience can work against you.	Yes	No
I agree	5ee1216a2a8a214e2ac6fb8b	64	Female	Other	Yes	Sorting items in the warehouse	Explanation 2	Explanation 3	Explanation 3	Explanation 4	common sense and logical thinking	Yes	No
I agree	672879d614dce67b8c3090ea	21	Female	Graduate Degree	Yes	Delivering goods to the loading zone	Explanation 2	Explanation 3	Explanation 5	Explanation 4	I tried to make sense of the scenario and I put myself in the AI's point of view to help make appropriate decisions.	Yes	Yes	I considered the operators understanding because as a human I put myself in their shoes to give me a feel of it it was me what explanation would I want. I also considered costs because at the end of the day as the operator you don't want to lose money due to inconsiderate thinking.
						100	60	67	66	71
							59	52	53	48
							51	58	52	59
							49	42	48	41
